# Supplementary material
Source: publisher figshare collection journal article supplement (https://tandf.figshare.com/articles/dataset/_/7969715)
Supplement: Supplementary file 1 [file 2]

Archive with 2 entries (2 files):
- iafd_a_1572192_sm1121.pdf
- iafd_a_1572192_sm1120.pdf
