# Supplementary material
Source: publisher figshare collection journal article supplement (https://tandf.figshare.com/articles/dataset/_/7969715)
Supplement: Supplementary file 1 [file 2 › iafd_a_1572192_sm1121.pdf]

## Databases Search Strategies

MEDLINE      date: August 28, 2017      number of articles retrived: 9017

- #1      amyotrophic lateral sclerosis
- #2      “amyotrophic lateral sclerosis”
- #3      “amyotrophic lateral sclerosis”[Mesh Terms]
- #4      motor neuron disease
- #5      “motor neuron disease”
- #6      ALS
- #7      MND
- #8      #1 OR #2 OR #3 OR #4 OR #5 OR #6 OR #7
- #9      “mortality”
- #10      “mortality”[Mesh Subheading]
- #11      “mortality”[Mesh Terms]
- #12      “survival”
- #13      “survival”[Mesh Terms]
- #14      “outcome assessment”
- #15      “outcome assessment (Health Care)”[Mesh Terms]
- #16      “outcome”
- #17      “prognosis”
- #18      “prognosis”[Mesh Terms]
- #19      “prognostic factor”
- #20      disease progression
- #21      “disease progression”
- #22      “disease progression”[Mesh Terms]
- #23      #9 OR #10 OR #11 OR #12 OR #13 OR #14 OR #15 OR #16 OR #17 OR #18 OR #19 OR #20 OR #21 OR #22
- #24      #8 AND #23

EMBASE      date: September 7, 2017      number of articles retrieved: 3510

- #1      ‘amyotrophic lateral sclerosis’/exp
- #2      ‘motor neuron disease’/exp
- #3      #1 OR #2
- #4      ‘outcome’/exp
- #5      ‘outcome assessment’/exp
- #6      ‘prognostic factor’
- #7      ‘mortality’/exp
- #8      ‘survival’/exp
- #9      ‘prognosis’/exp
- #10      ‘disease course’/exp
- #11      #4 OR #5 OR #6 OR #7 OR #8 OR #9 OR #10
- #12      #3 AND #11
- #13      #3 AND #11 AND [embase]/lim
